# Supplementary material
Source: MDPI journal article supplement (https://www.mdpi.com/2076-3417/11/18/8603)
Supplement: s1 [file s1]

## S1\_Carob moth biological background

### Carob moth

The carob moth, *Ectomyelois ceratoniae* (Zeller) (Lepidoptera: Pyralidae), is a destructive polyphagous pest worldwide that attacks the fruits of a variety of commercially important plants before and after harvest. In addition to the species mentioned in the main paper Pistachio [*Pistachia vera* L. (Anacardiaceae)] is another major host of this insect in the Middle East [1-4]. *Ectomyelois ceratoniae* has 4-5 generations per year on pomegranate in the field in the Middle East [5]. Previously, it was shown that delta sticky traps baited with pomegranate fruits of different stages of fruit ripening caught male and female carob moths in the field [4].

### Sex pheromones

Since the egg-laying and larval feeding activity occur within the fruits and are thus hidden from the outside world, commercial insecticides are not efficient and thus not used against this pest insect. In addition, an efficient sex pheromone attractant is still lacking in carob moth pest management. In moth pests, long-range female sex pheromones are well established in pest management programs for monitoring, mass-trapping, and mating disruption [6]. The major female sex pheromone component [(Z,E)-9,11,13-tetradecatrienal] is unstable [7], which is the reason that a stable mimic of this component, viz., (Z,E)-7,9,11-dodecatrienyl formate, is used in commercial sex pheromone lures. However, these lures are not efficient in pomegranate orchards in the Middle East [8,9].

### Insect- plant interactions

Insects synchronize their life cycle with that of their host plant to optimize food intake and enhance their growth rate [10,11]. Synchronization can be achieved when insects respond to signals that are specific to different phenological stages or parts of the host plant [12]. Phenological stage is known to affect insect attraction and oviposition behaviour via different chemical cues [13-18]. Different plant parts of the same phenological stage may also emit distinctly different volatile blends [18-20]. Individual plant volatiles are not always specific, and in fact many of them are common to most plant species. Host attraction is likely encoded by a specific blend of host-plant volatiles, comprising both attractants and repellents. At high concentrations, an attractive host plant volatile may become unattractive or even repellent to the herbivorous insect [21-24]. Males, virgin females, and gravid females may respond differently to host-plant volatiles, as the threshold and ultimate outcome of the response of insects to plant volatiles is determined by the integration of external stimuli with the internal physiological state of the insect [22, 25-27].

1. Dhoubi, M.H. Etude Bioecologique D'*ectomyeloisceratoniae* (zeller) (lepidoptera, pyralidae) dans les zones presahariennes de la Tunisie. Thèse de Docteur-Ingénieur Dissertation, Université Pierre et Marie Curie, Paris, France, 1984.
2. Gothilf, S. Biology of *Spectrobates ceratoniae* on almonds in Israel. *Phytoparasitica* **1984**, *12*, 77–87, <https://doi.org/10.1007/bf02980801>.
3. Mehrnejad, M. Biology of carob moth, *Ectomyelois ceratoniae* new pest on pistachio in Rafsanjan. *Appl. Entomol. Phytopathol.* **2002**, *60*, 1–11.
4. Hosseini, S.A.; Goldansaz, S.H.; Menken, S.B.J.; Van Wijk, M.; Roessingh, P.; Groot, A.T. Field Attraction of Carob Moth to Host Plants and Conspecific Females. *J. Econ. Entomol.* **2017**, *110*, 2076–2083, <https://doi.org/10.1093/jee/tox218>.
5. Al-Izzi, M.A.; Al-Maliky, S.; Younis, M.; Jabbo, N. Bionomics of *ectomyelois ceratoniae* (lepidoptera: Pyralidae) on pomegranates in Iraq. *Environ. Entomol.* **1985**, *14*, 149–153.
6. Witzgall, P.; Kirsch, P.; Cork, A. Sex Pheromones and Their Impact on Pest Management. *J. Chem. Ecol.* **2010**, *36*, 80–100, <https://doi.org/10.1007/s10886-009-9737-y>.
7. Baker, T.C.; Francke, W.; Millar, J.G.; Hansson, B.; Du, J.W.; Phelan, P.L.; Vetter, R.S.; Youngman, R.; Todd, J.L. Identification and bioassay of sex pheromone components of carob moth, *Ectomyelois ceratoniae* (Zeller). *J. Chem. Ecol.* **1991**, *17*, 1973–1988, <https://doi.org/10.1007/bf00992582>.

8. Avand-Faghih, A.; Rastegari, N.; Jafari Nodooshan, A. Effect of dispenser type and dose of the pheromone mimic, (Z,E)- 7,9,11-dodecatrienyl formate, on trapping of carob moth, *ectomyelois ceratoniae* (zeller). In Proceedings of the 20th Iranian Plant Protection Congress, Shiraz, Iran, 26–29 August 2012; p. 841.
9. Dhouibi, M.H.; Hermi, N.; Soudani, D.; Thlibi, H. Biocontrol of the carob moth *ectomyelois ceratoniae* (lepidoptera, pyralidae) in pomegranate and citrus orchards in Tunisia. *Int. J. Agri. Innov. Res.* **2016**, *4*, 2319–1473.
10. Kooi, R.E.; Water, T.P.M.; Herrebout, W.M. Food acceptance by a monophagous and an oligophagous insect in relation to seasonal changes in host plant suitability. *Entomol. Exp. Appl.* **1991**, *59*, 111–122, <https://doi.org/10.1111/j.1570-7458.1991.tb01494.x>.
11. Schoonhoven, L.M.; Van Loon, J.J.; Dicke, M. *Insect-Plant Biology*; Oxford University Press: Oxford, UK, 2005.
12. Proffitt, M.; Schatz, B.; Borges, R.M.; Hossaert-Mckey, M. Chemical mediation and niche partitioning in non-pollinating fig-wasp communities. *J. Anim. Ecol.* **2007**, *76*, 296–303, <https://doi.org/10.1111/j.1365-2656.2007.01213.x>.
13. Ramaswamy, S.B. Host finding by moths: Sensory modalities and behaviors. *J. Insect Physiol.* **1988**, *34*, 235–249.
14. van Rensburg, J.; Giliomee, J.; Walters, M.; Aspects of the injuriousness of the maize stalk borer, *Busseola fusca* (fuller) (lepidoptera: Noctuidae). *Bull. Entomol. Res.* **1988**, *78*, 101–110.
15. Sosa, O. Pubescence in sugarcane as a plant resistance character affecting oviposition and mobility by the sugarcane borer (lepidoptera: Pyralidae). *J. Econ. Entomol.* **1988**, *81*, 663–667.
16. Spangler, S.M.; Calvin, D.D. Influence of sweet corn growth stages on European corn borer (lepidoptera: Crambidae) oviposition. *Environ. Entomol.* **2000**, *29*, 1226–1235.
17. Smyth, R.R.; Hoffmann, M.P.; Shelton, A.M. Effects of host plant phenology on oviposition preference of *crocidolomia pavo-nana* (lepidoptera: Pyralidae). *Environ. Entomol.* **2003**, *32*, 756–764.
18. Tassin, M.; Anfora, G.; Ioriatti, C.; Carlin, S.; De Cristofaro, A.; Schmidt, S.; Bengtsson, M.; Versini, G.; Witzgall, P. Antennal and behavioral responses of grapevine moth *Lobesia botrana* females to volatiles from grapevine. *J. Chem. Ecol.* **2005**, *31*, 77–87, <https://doi.org/10.1007/s10886-005-0975-3>.
19. Bengtsson, M.; Bäckman, A.-C.; Liblikas, I.; Ramirez, M.I.; Borg-Karlson, A.-K.; Ansebo, L.; Anderson, P.; Löfqvist, J.; Witzgall, P. Plant Odor Analysis of Apple: Antennal Response of Codling Moth Females to Apple Volatiles during Phenological Development. *J. Agric. Food Chem.* **2001**, *49*, 3736–3741, <https://doi.org/10.1021/jf0100548>.
20. Vallat, A.; Dorn, S. Changes in Volatile Emissions from Apple Trees and Associated Response of Adult Female Codling Moths over the Fruit-Growing Season. *J. Agric. Food Chem.* **2005**, *53*, 4083–4090, <https://doi.org/10.1021/jf048499u>.
21. Finch, S. Volatile Plant Chemicals and Their Effect on Host Plant Finding by the Cabbage Root Fly (*Delia Brassicae*). *Entomol. Exp. Appl.* **1978**, *24*, 350–359, <https://doi.org/10.1111/j.1570-7458.1978.tb02793.x>.
22. Hern, A.; Dorn, S. Sexual dimorphism in the olfactory orientation of adult *Cydia pomonella* in response to  $\alpha$ -farnesene. *Entomol. Exp. Appl.* **1999**, *92*, 63–72.
23. Mewis, I.; Ulrich, C.; Schnitzler, W. The role of glucosinolates and their hydrolysis products in oviposition and host-plant finding by cabbage webworm, *Hellula undalis*. *Entomol. Exp. et Appl.* **2002**, *105*, 129–139, <https://doi.org/10.1046/j.1570-7458.2002.01041.x>.
24. Cha, D.H.; Teal, P.E.A.; Zhang, A.; Roelofs, W.L.; Loeb, G.M. Eavesdropping on Plant Volatiles by a Specialist Moth: Significance of Ratio and Concentration. *PLoS ONE* **2011**, *6*, e17033, <https://doi.org/10.1371/journal.pone.0017033>.
25. Miller, J.R.; Strickler, K.L. Finding and accepting host plants. In *Chemical Ecology of Insects*; Bell, W., Cardé, R., Eds.; Chapman and Hall: London, UK, 1984; pp. 127.
26. Mechaber, W.L.; Capaldo, C.T.; Hildebrand, J.G. Behavioral responses of adult female tobacco hornworms, *Manduca sexta*, to hostplant volatiles change with age and mating status. *J. Insect Sci.* **2002**, *2*, 5.
27. Masante-Roca, I.; Anton, S.; Delbac, L.; Dufour, M.-C.; Gadenne, C. Attraction of the grapevine moth to host and non-host plant parts in the wind tunnel: Effects of plant phenology, sex, and mating status. *Entomol. Exp. Appl.* **2007**, *122*, 239–245, <https://doi.org/10.1111/j.1570-7458.2006.00510.x>.
