# Supplementary material
Source: MDPI journal article supplement (https://www.mdpi.com/2076-3417/11/18/8603)

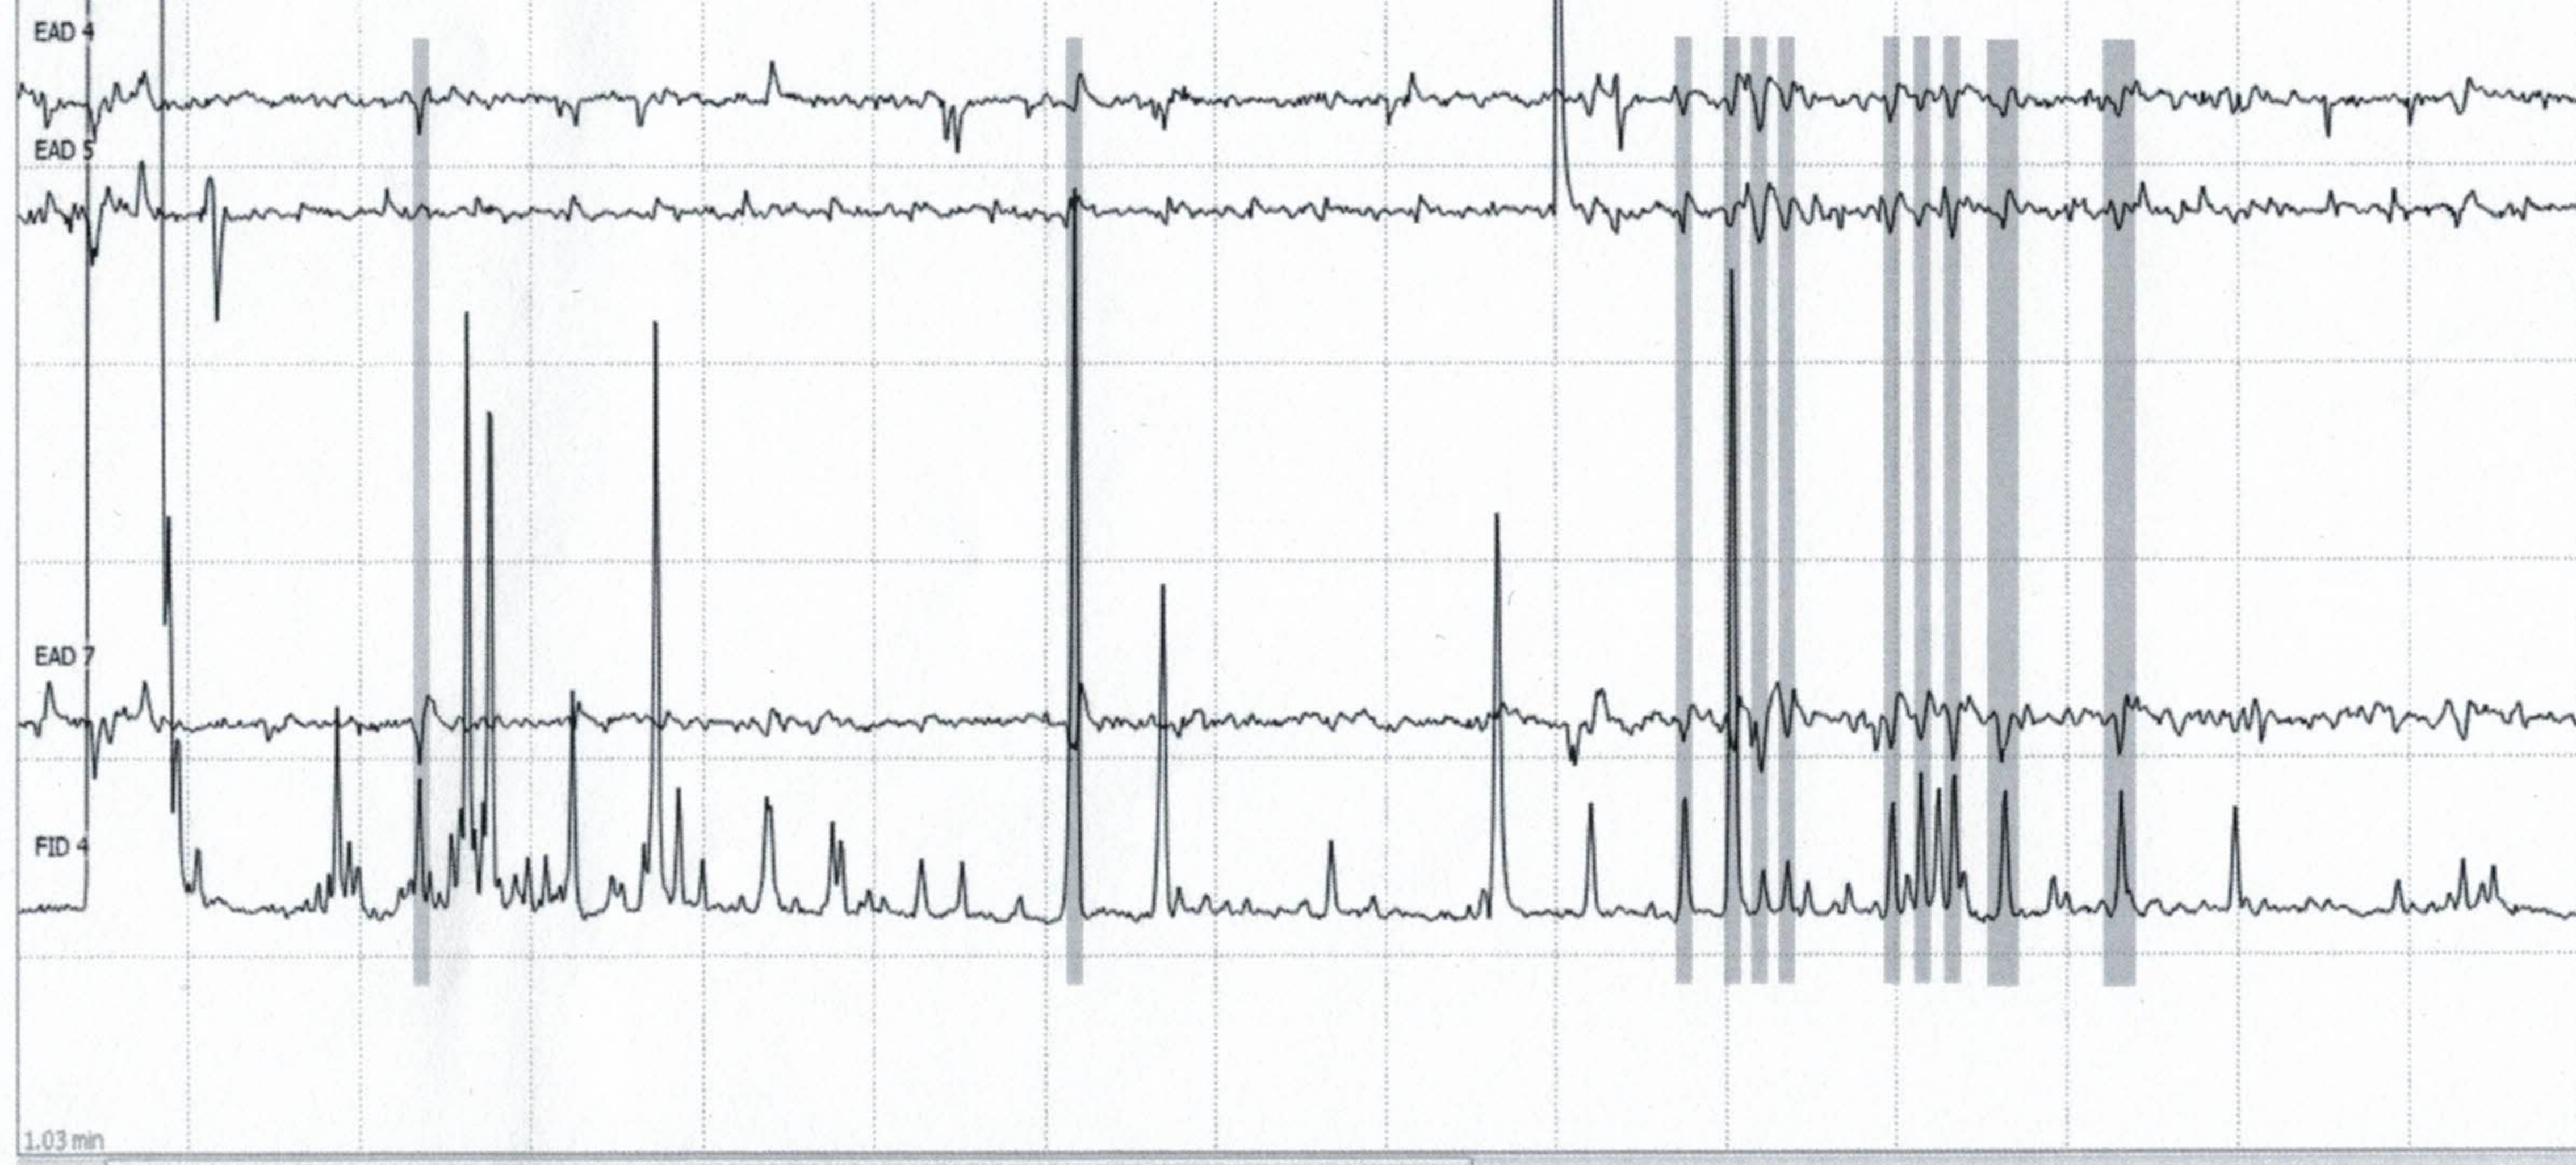

Supplement: s1 [file s1]

$\beta$ -caryophellene relative to constant solvent peak @ RI 6.99

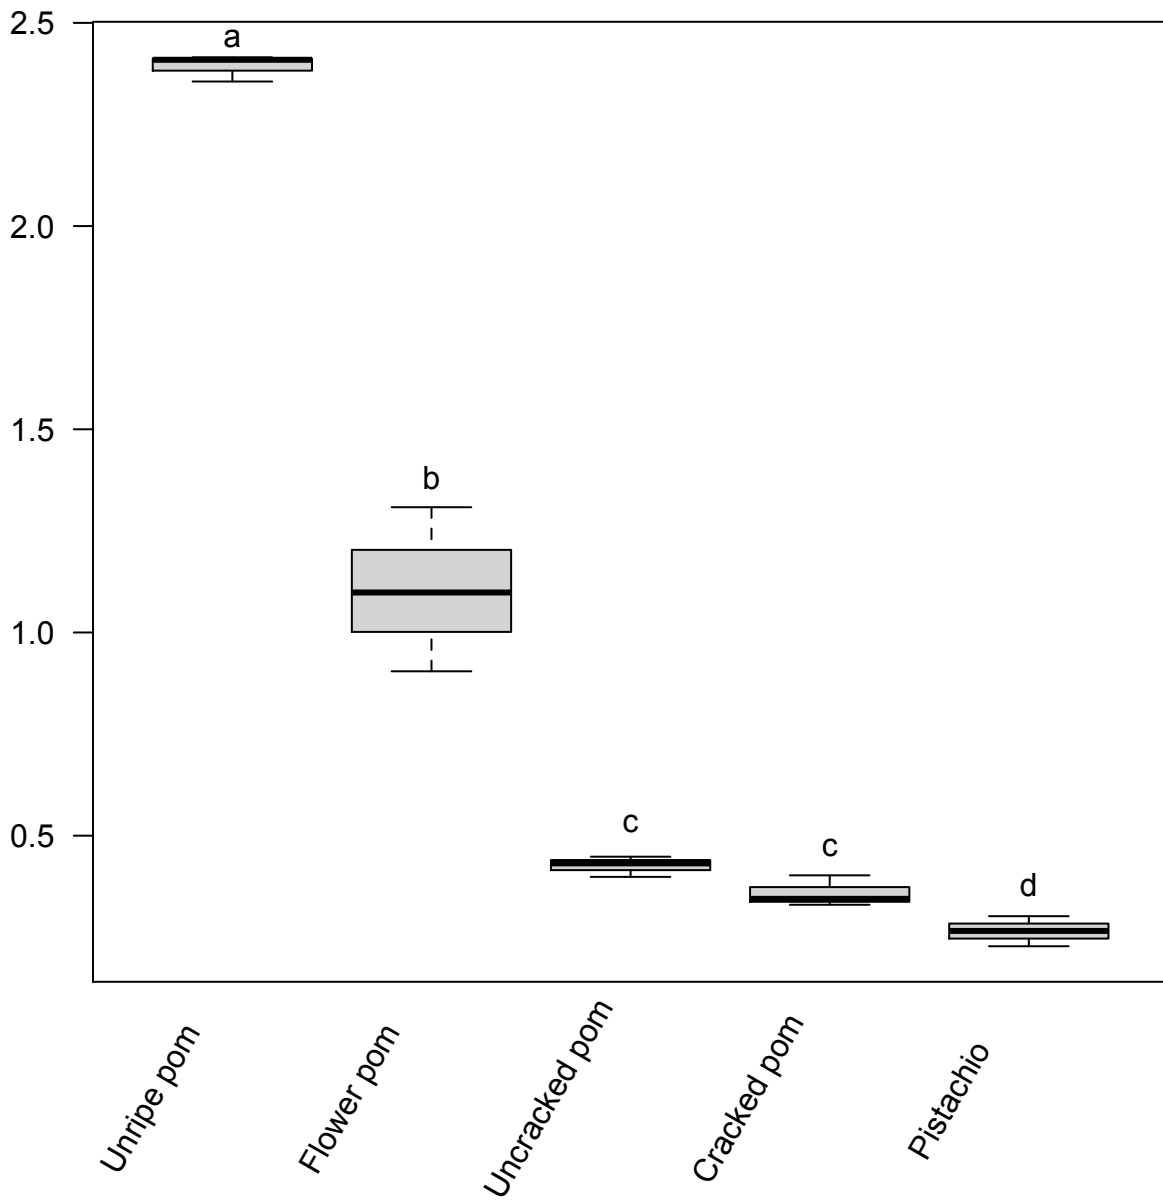

Supplement: s1 [file s1]

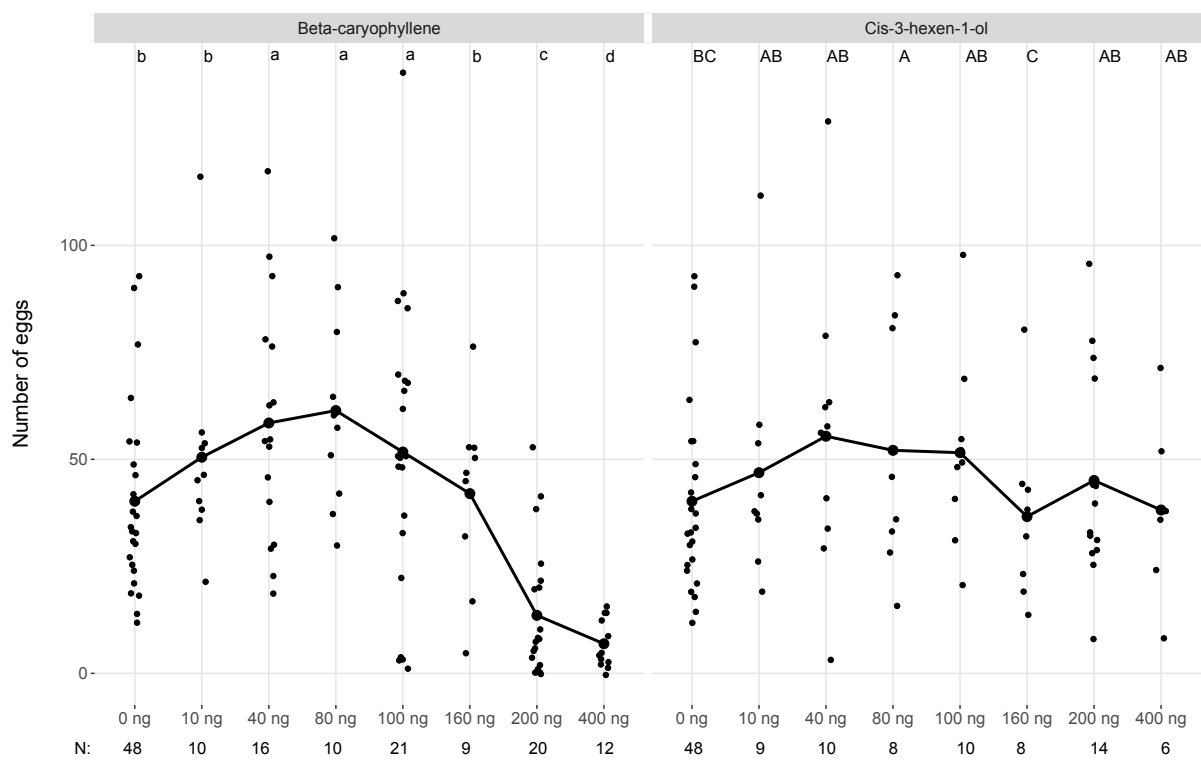

Supplement: s1 [file s1]

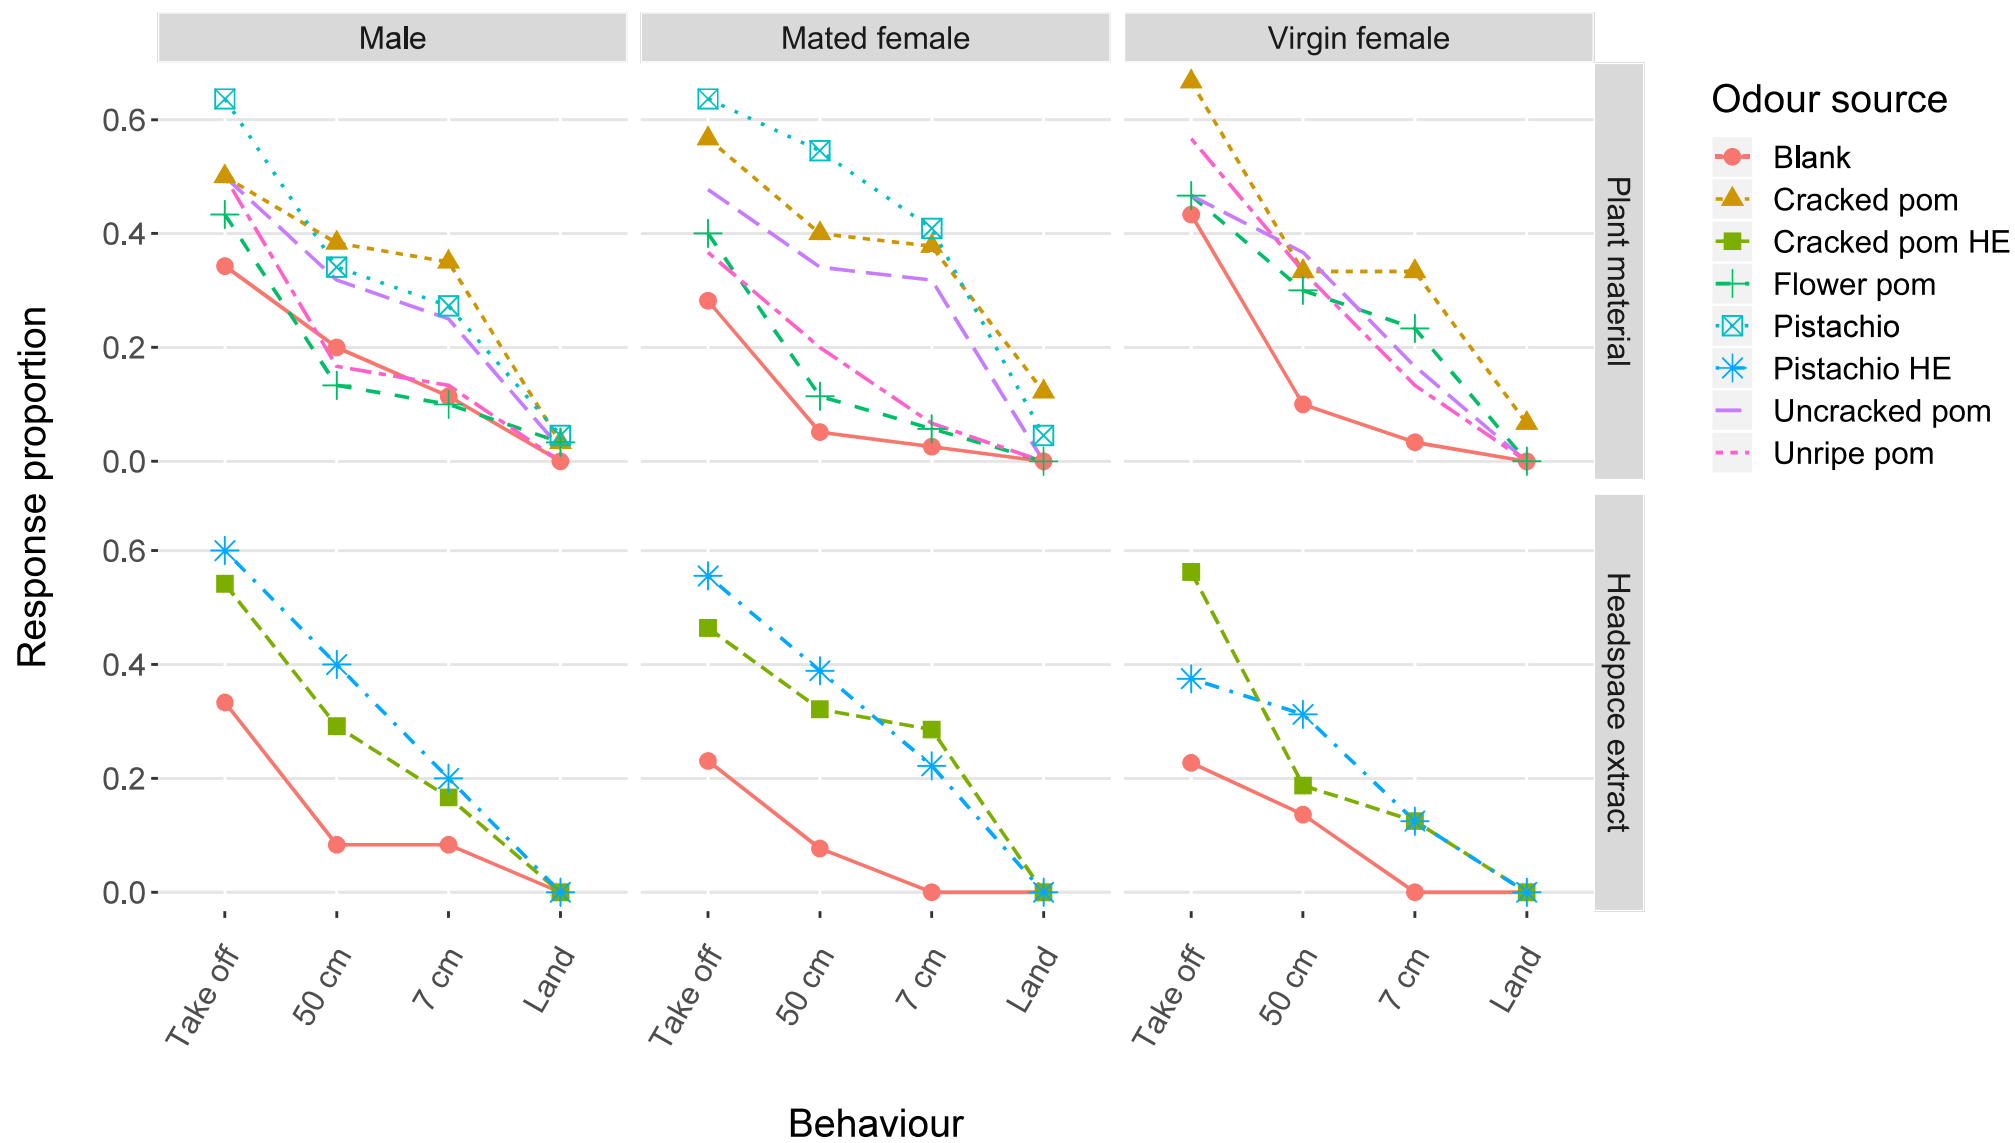

Supplement: s1 [file s1]

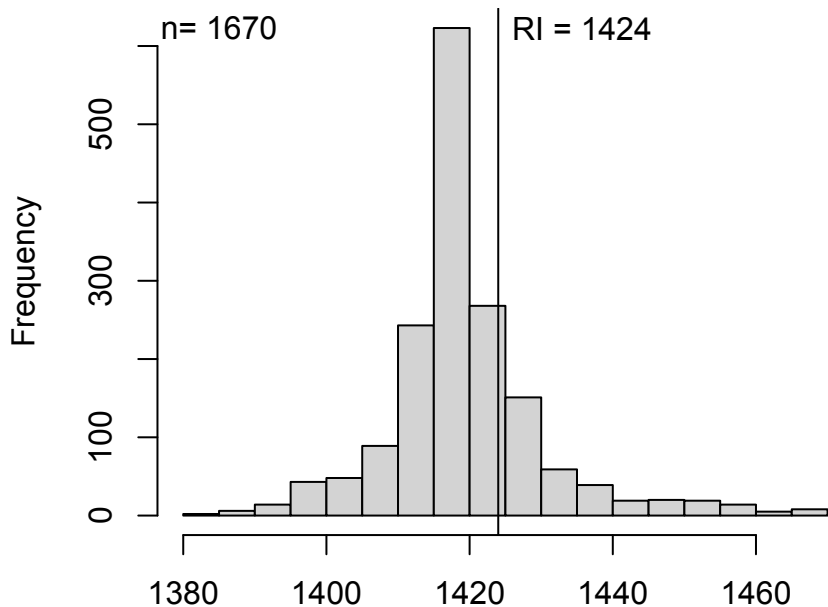

Kovats rentention indices for Caryophyllene

Supplement: s1 [file s1]
